# Supplementary material for: Confidence Analysis of Standard Deviational Ellipse and Its Extension into Higher Dimensional Euclidean Space
Source: PLoS One. 2015 Mar 13;10(3):e0118537. doi: 10.1371/journal.pone.0118537 (PMC4358977; doi:10.1371/journal.pone.0118537)
Supplement: S1 Table — (XLSX) [file pone.0118537.s001.xlsx]

## Sheet: Sheet1
日期	Lat	Long_	N-Y	E-X	CCOUNTS	Days Outbreak
2009-05-01	22.2779	114.171	815444	835618	1	1
2009-05-13	22.3159	113.936	819678	811404	1	13
2009-05-17	22.3157	113.936	819652	811413	1	17
2009-05-18	22.324	114.173	820553	835870	1	18
2009-05-22	22.3066	114.193	818631	837926	1	22
2009-05-23	22.3159	113.936	819671	811404	2	23
2009-05-25	22.2706	114.194	814642	837993	2	25
2009-05-26	22.4269	114.238	831944	842568	1	26
2009-05-26	22.2801	114.155	815694	834014	1	26
2009-05-27	22.2707	114.194	814647	837993	1	27
2009-05-27	22.3838	113.977	827190	815683	1	27
2009-05-27	22.3309	114.222	821318	840948	1	27
2009-05-28	22.286	114.139	816342	832340	1	28
2009-05-28	22.2706	114.192	814642	837781	1	28
2009-05-28	22.3251	114.187	820675	837266	1	28
2009-05-29	22.3487	114.101	823295	828413	1	29
2009-05-29	22.3156	113.936	819647	811411	1	29
2009-05-29	22.4832	114.142	838182	832640	1	29
2009-05-29	22.2611	114.236	813588	842379	2	29
2009-05-29	22.2798	114.173	815654	835868	1	29
2009-05-30	22.3574	114.099	824254	828227	1	30
2009-05-30	22.3156	113.935	819639	811383	1	30
2009-05-30	22.2613	114.237	813610	842448	1	30
2009-05-30	22.2782	114.226	815483	841324	1	30
2009-06-02	22.4845	114.14	838329	832496	1	33
2009-06-02	22.3378	114.195	822078	838157	1	33
2009-06-02	22.322	114.221	820332	840767	1	33
2009-06-03	22.2644	114.183	813949	836865	1	34
2009-06-04	22.3157	113.935	819658	811387	1	35
2009-06-04	22.5114	114.072	841312	825527	1	35
2009-06-04	22.3685	114.114	825489	829748	1	35
2009-06-05	22.2778	114.165	815435	835083	1	36
2009-06-05	22.3966	114.2	828594	838632	1	36
2009-06-06	22.4228	114.226	831496	841325	1	37
2009-06-06	22.3156	113.935	819649	811398	1	37
2009-06-06	22.4043	114.225	829442	841266	1	37
2009-06-07	22.3158	113.936	819661	811402	3	38
2009-06-07	22.335	114.172	821773	835806	1	38
2009-06-07	22.3004	114.168	817941	835344	1	38
2009-06-07	22.2775	114.165	815425	835091	1	38
2009-06-08	22.3106	114.234	819092	842208	1	39
2009-06-08	22.3156	113.936	819641	811421	1	39
2009-06-09	22.4488	114.176	834371	836178	1	40
2009-06-09	22.3156	113.936	819640	811407	2	40
2009-06-09	22.3062	114.168	818583	835303	1	40
2009-06-10	22.2769	114.241	815343	842854	1	41
2009-06-10	22.2857	114.193	816311	837899	1	41
2009-06-10	22.2862	114.217	816393	840415	1	41
2009-06-10	22.2786	114.187	815526	837343	1	41
2009-06-10	22.3025	114.19	818171	837668	1	41
2009-06-10	22.2795	114.186	815621	837222	1	41
2009-06-10	22.2884	114.194	816616	838043	1	41
2009-06-10	22.2846	114.157	816186	834255	1	41
2009-06-11	22.3157	113.935	819651	811394	2	42
2009-06-11	22.2819	114.229	815893	841639	1	42
2009-06-11	22.3373	114.215	822029	840185	1	42
2009-06-11	22.3856	114.204	827372	839102	1	42
2009-06-11	22.2683	114.234	814385	842155	1	42
2009-06-11	22.2917	114.205	816976	839145	1	42
2009-06-11	22.2827	114.192	815978	837804	1	42
2009-06-11	22.3231	114.259	820459	844696	1	42
2009-06-11	22.2876	114.22	816527	840716	1	42
2009-06-11	22.3339	114.196	821650	838231	1	42
2009-06-12	22.2661	114.252	814140	843973	1	43
2009-06-12	22.3328	114.148	821526	833266	1	43
2009-06-12	22.2601	114.231	813481	841806	1	43
2009-06-12	22.2742	114.194	815043	838016	1	43
2009-06-12	22.266	114.188	814131	837447	1	43
2009-06-12	22.3065	114.236	818622	842352	1	43
2009-06-12	22.2864	114.219	816387	840653	1	43
2009-06-12	22.3157	113.935	819651	811394	3	43
2009-06-13	22.3442	114.177	822791	836237	1	44
2009-06-13	22.3335	114.168	821609	835403	1	44
2009-06-13	22.3025	114.236	818172	842376	1	44
2009-06-13	22.3068	114.162	818645	834687	1	44
2009-06-13	22.3157	113.935	819651	811394	3	44
2009-06-14	22.2841	114.147	816135	833164	1	45
2009-06-14	22.284	114.218	816121	840523	1	45
2009-06-14	22.2871	114.19	816468	837646	1	45
2009-06-14	22.2913	114.194	816931	837994	1	45
2009-06-14	22.3157	113.935	819651	811394	2	45
2009-06-15	22.277	114.179	815344	836464	1	46
2009-06-15	22.3325	114.222	821491	840932	1	46
2009-06-15	22.3157	114.177	819632	836231	2	46
2009-06-15	22.334	114.148	821657	833292	1	46
2009-06-15	22.2864	114.216	816396	840293	1	46
2009-06-15	22.2446	114.145	811767	833016	1	46
2009-06-15	22.3667	114.117	825283	830141	1	46
2009-06-15	22.3281	114.176	821005	836231	1	46
2009-06-15	22.3162	114.264	819691	845279	1	46
2009-06-15	22.3151	114.264	819574	845205	1	46
2009-06-15	22.3156	113.935	819641	811387	2	46
2009-06-16	22.3355	114.178	821827	836389	2	47
2009-06-16	22.316	114.163	819672	834883	1	47
2009-06-16	22.2779	114.17	815447	835554	1	47
2009-06-16	22.2853	114.132	816272	831647	1	47
2009-06-16	22.2882	114.14	816588	832503	1	47
2009-06-16	22.2852	114.137	816257	832190	1	47
2009-06-16	22.3422	114.177	822568	836327	1	47
2009-06-16	22.2818	114.213	815879	839964	1	47
2009-06-16	22.2838	114.217	816104	840421	1	47
2009-06-16	22.2525	114.151	812632	833648	1	47
2009-06-16	22.2857	114.218	816312	840476	1	47
2009-06-16	22.2741	114.157	815032	834201	1	47
2009-06-17	22.3231	114.227	820459	841459	1	48
2009-06-17	22.378	114.171	826537	835682	1	48
2009-06-17	22.3932	114.207	828221	839352	1	48
2009-06-17	22.4263	114.227	831883	841479	1	48
2009-06-17	22.3391	114.139	822226	832374	1	48
2009-06-17	22.3193	114.157	820029	834243	1	48
2009-06-17	22.331	114.175	821332	836076	1	48
2009-06-17	22.3025	114.172	818171	835769	1	48
2009-06-17	22.3154	114.179	819601	836482	1	48
2009-06-17	22.3341	114.175	821670	836028	1	48
2009-06-17	22.3096	114.177	818958	836283	1	48
2009-06-17	22.2438	114.15	811675	833511	1	48
2009-06-17	22.3689	114.096	825526	827972	1	48
2009-06-17	22.2872	114.198	816475	838443	1	48
2009-06-17	22.3277	114.183	820967	836881	1	48
2009-06-17	22.3083	114.193	818814	837886	1	48
2009-06-17	22.2927	114.197	817084	838292	1	48
2009-06-17	22.2622	114.134	813707	831859	1	48
2009-06-17	22.2852	114.197	816261	838312	1	48
2009-06-17	22.332	114.222	821442	840951	1	48
2009-06-17	22.3157	114.176	819631	836229	1	48
2009-06-17	22.2906	114.204	816859	839020	1	48
2009-06-17	22.2771	114.223	815366	841006	1	48
2009-06-17	22.3091	114.235	818909	842277	1	48
2009-06-17	22.3311	114.159	821342	834399	1	48
2009-06-17	22.5031	114.13	840384	831423	1	48
2009-06-17	22.2733	114.172	814936	835809	1	48
2009-06-17	22.3339	114.196	821649	838230	1	48
2009-06-17	22.2551	114.193	812926	837971	1	48
2009-06-17	22.2854	114.132	816275	831648	1	48
2009-06-17	22.2731	114.155	814922	834065	1	48
2009-06-17	22.3193	114.267	820038	845587	1	48
2009-06-17	22.333	114.19	821550	837616	1	48
2009-06-17	22.4428	114.167	833712	835291	1	48
2009-06-17	22.3251	114.173	820672	835888	1	48
2009-06-17	22.2806	114.149	815751	833419	1	48
2009-06-17	22.3307	114.223	821298	841036	1	48
2009-06-18	22.2682	114.185	814376	837074	1	49
2009-06-18	22.2394	114.194	811180	838046	1	49
2009-06-18	22.3668	114.116	825293	830033	1	49
2009-06-18	22.3381	114.215	822117	840146	1	49
2009-06-18	22.2795	114.189	815629	837493	1	49
2009-06-18	22.3239	114.184	820540	837048	1	49
2009-06-18	22.3013	114.236	818036	842386	1	49
2009-06-18	22.3305	114.175	821278	836038	1	49
2009-06-18	22.2747	114.196	815098	838228	1	49
2009-06-18	22.4215	114.236	831354	842322	1	49
2009-06-18	22.3158	114.176	819641	836132	1	49
2009-06-18	22.332	114.225	821442	841205	1	49
2009-06-18	22.2447	114.147	811775	833223	1	49
2009-06-18	22.2946	114.241	817298	842830	1	49
2009-06-18	22.2658	114.252	814110	843962	1	49
2009-06-18	22.3613	114.136	824679	832107	1	49
2009-06-18	22.2758	114.241	815220	842911	1	49
2009-06-18	22.2644	114.183	813950	836869	1	49
2009-06-18	22.3723	114.103	825906	828662	1	49
2009-06-18	22.3088	114.239	818872	842639	1	49
2009-06-18	22.3439	114.191	822756	837690	1	49
2009-06-18	22.2752	114.156	815154	834125	1	49
2009-06-18	22.2763	114.168	815274	835325	1	49
2009-06-18	22.3379	114.14	822090	832483	1	49
2009-06-18	22.2908	114.201	816879	838739	1	49
2009-06-18	22.3052	114.25	818475	843826	1	49
2009-06-18	22.3217	114.183	820302	836909	1	49
2009-06-18	22.2539	114.183	812792	836906	1	49
2009-06-18	22.3314	114.178	821369	836420	1	49
2009-06-18	22.4923	114.143	839193	832785	1	49
2009-06-19	22.3025	114.172	818173	835770	1	50
2009-06-19	22.306	114.228	818562	841489	1	50
2009-06-19	22.3724	113.967	825927	814678	1	50
2009-06-19	22.3685	114.114	825479	829749	1	50
2009-06-19	22.333	114.225	821547	841234	1	50
2009-06-19	22.3164	114.238	819718	842515	1	50
2009-06-19	22.2878	113.941	816565	811920	1	50
2009-06-19	22.2744	114.152	815059	833718	1	50
2009-06-19	22.3167	114.163	819750	834875	1	50
2009-06-19	22.3392	114.194	822236	838029	1	50
2009-06-19	22.2903	114.198	816817	838494	1	50
2009-06-19	22.3869	113.978	827536	815797	1	50
2009-06-19	22.3353	114.167	821808	835296	1	50
2009-06-19	22.229	114.217	810038	840451	1	50
2009-06-19	22.3883	113.978	827683	815798	1	50
2009-06-19	22.4179	114.225	830910	841211	1	50
2009-06-19	22.2756	113.931	815218	810970	1	50
2009-06-19	22.4402	114.178	833426	836337	1	50
2009-06-19	22.2764	114.156	815278	834138	1	50
2009-06-20	22.3274	114.183	820933	836913	1	51
2009-06-20	22.2706	114.178	814641	836370	1	51
2009-06-20	22.387	113.974	827546	815398	1	51
2009-06-20	22.2941	114.175	817248	836089	1	51
2009-06-20	22.3931	114.19	828200	837597	1	51
2009-06-20	22.3692	114.099	825564	828232	1	51
2009-06-20	22.4587	114.008	835482	818890	1	51
2009-06-20	22.318	114.227	819893	841409	1	51
2009-06-20	22.3166	114.222	819730	840930	1	51
2009-06-20	22.2726	114.125	814879	830955	1	51
2009-06-21	22.2629	114.133	813784	831786	1	52
2009-06-21	22.2624	114.134	813735	831837	1	52
2009-06-21	22.291	114.193	816894	837958	1	52
2009-06-21	22.4274	114.243	832010	843098	1	52
2009-06-21	22.3994	114.202	828904	838841	1	52
2009-06-21	22.3094	114.177	818940	836246	1	52
2009-06-21	22.3695	114.127	825589	831073	1	52
2009-06-21	22.4195	114.224	831127	841116	1	52
2009-06-21	22.3188	114.177	819972	836282	1	52
2009-06-21	22.3325	114.148	821496	833299	1	52
2009-06-21	22.4498	114.161	834479	834681	1	52
2009-06-21	22.2885	114.202	816621	838862	1	52
2009-06-21	22.2438	114.15	811670	833513	1	52
2009-06-21	22.2924	113.942	817071	812047	1	52
2009-06-21	22.3599	114.255	824522	844291	1	52
2009-06-21	22.3211	114.189	820230	837553	1	52
2009-06-21	22.2822	114.131	815921	831589	1	52
2009-06-21	22.33	114.206	821218	839292	1	52
2009-06-21	22.2903	114.199	816817	838497	1	52
2009-06-21	22.3048	114.161	818223	834746	1	52
2009-06-21	22.2509	114.192	812457	837801	1	52
2009-06-21	22.4275	114.245	832026	843232	1	52
2009-06-21	22.3166	114.175	819731	836045	1	52
2009-06-21	22.2788	114.194	815549	838026	1	52
2009-06-21	22.2297	114.219	810112	840568	1	52
2009-06-21	22.2979	114.168	817659	835362	1	52
2009-06-21	22.3141	114.182	819459	836812	1	52
2009-06-21	22.4528	114.171	834832	835686	1	52
2009-06-21	22.276	114.18	815237	836550	1	52
2009-06-21	22.3682	114.133	825449	831720	1	52
2009-06-21	22.2789	114.179	815563	836522	1	52
2009-06-21	22.2871	114.195	816471	838090	1	52
2009-06-21	22.3663	114.123	825237	830746	1	52
2009-06-21	22.3842	114.203	827221	838993	1	52
2009-06-21	22.401	114.198	829079	838422	1	52
2009-06-21	22.3807	114.217	826828	840386	1	52
2009-06-21	22.3663	114.118	825242	830221	1	52
2009-06-21	22.3395	114.195	822271	838163	1	52
2009-06-21	22.2959	114.171	817437	835650	1	52
2009-06-21	22.2766	114.193	815306	837981	1	52
2009-06-21	22.3214	114.186	820264	837183	1	52
2009-06-21	22.3626	114.129	824824	831381	1	52
2009-06-21	22.3339	114.195	821649	838085	1	52
2009-06-21	22.4605	114.003	835674	818409	1	52
2009-06-22	22.3842	113.974	827236	815356	1	53
2009-06-22	22.4053	113.983	829572	816292	1	53
2009-06-22	22.3747	114.192	826169	837830	1	53
2009-06-22	22.3667	114.117	825275	830139	1	53
2009-06-22	22.4633	114.001	835985	818163	1	53
2009-06-22	22.3498	114.105	823411	828896	1	53
2009-06-22	22.275	114.153	815132	833791	1	53
2009-06-22	22.3849	114.11	827283	829349	1	53
2009-06-22	22.3627	114.102	824844	828569	1	53
2009-06-22	22.334	114.193	821657	837896	1	53
2009-06-22	22.4242	114.231	831646	841830	1	53
2009-06-22	22.4778	114.043	837590	822500	1	53
2009-06-22	22.3294	114.192	821156	837827	1	53
2009-06-22	22.3378	114.189	822077	837561	1	53
2009-06-22	22.42	114.224	831189	841161	1	53
2009-06-22	22.3427	114.209	822619	839590	1	53
2009-06-22	22.257	114.2	813135	838658	1	53
2009-06-22	22.2974	114.175	817610	836053	1	53
2009-06-22	22.267	114.184	814237	836999	1	53
2009-06-22	22.3141	114.182	819452	836817	1	53
2009-06-22	22.3288	114.188	821077	837389	1	53
2009-06-22	22.3461	114.189	822995	837545	1	53
2009-06-22	22.3341	114.197	821668	838303	1	53
2009-06-22	22.3449	114.204	822864	839046	1	53
2009-06-23	22.2926	114.198	817080	838422	1	54
2009-06-23	22.2289	114.217	810023	840442	1	54
2009-06-23	22.4674	114	836440	818114	1	54
2009-06-23	22.3213	114.187	820254	837262	1	54
2009-06-23	22.4211	114.225	831307	841175	1	54
2009-06-23	22.3463	114.192	823024	837836	1	54
2009-06-23	22.4416	114.028	833584	820988	1	54
2009-06-23	22.4689	113.998	836611	817873	1	54
2009-06-23	22.3476	114.202	823170	838846	1	54
2009-06-23	22.3055	114.227	818508	841424	1	54
2009-06-23	22.32	114.18	820108	836565	1	54
2009-06-23	22.2655	114.242	814074	842955	1	54
2009-06-23	22.3481	114.204	823226	839042	1	54
2009-06-23	22.3314	114.147	821368	833184	1	54
2009-06-23	22.3813	113.966	826909	814510	1	54
2009-06-23	22.2834	114.213	816060	839969	1	54
2009-06-23	22.2876	114.215	816525	840197	1	54
2009-06-23	22.3424	114.201	822592	838724	1	54
2009-06-23	22.3842	113.972	827237	815216	1	54
2009-06-23	22.307	114.193	818673	837903	1	54
2009-06-23	22.3248	114.175	820643	836067	1	54
2009-06-23	22.3247	114.176	820626	836139	1	54
2009-06-23	22.321	114.225	820226	841227	1	54
2009-06-23	22.2733	114.193	814941	837925	1	54
2009-06-23	22.4009	113.972	829084	815218	1	54
2009-06-23	22.3667	114.117	825285	830139	1	54
2009-06-23	22.3621	114.043	824783	822503	1	54
2009-06-23	22.3475	114.204	823158	839033	1	54
2009-06-23	22.3226	114.189	820394	837568	1	54
2009-06-23	22.3419	114.21	822537	839639	1	54
2009-06-23	22.2422	114.149	811492	833394	1	54
2009-06-23	22.3227	114.257	820413	844524	1	54
2009-06-23	22.3076	114.179	818734	836464	1	54
2009-06-23	22.3087	114.171	818864	835673	1	54
2009-06-23	22.3482	114.203	823232	838993	1	54
2009-06-23	22.3357	114.218	821847	840516	1	54
2009-06-23	22.2427	114.148	811552	833318	1	54
2009-06-23	22.282	114.22	815907	840681	1	54
2009-06-23	22.2913	114.196	816928	838277	1	54
2009-06-23	22.3481	114.199	823218	838503	1	54
2009-06-23	22.3471	114.199	823116	838555	1	54
2009-06-23	22.3661	114.137	825184	832091	1	54
2009-06-23	22.3398	114.187	822308	837361	1	54
2009-06-23	22.2511	114.151	812484	833573	1	54
2009-06-23	22.2373	114.227	810951	841453	1	54
2009-06-23	22.263	114.133	813801	831722	1	54
2009-06-23	22.4225	114.229	831459	841684	1	54
2009-06-23	22.3454	114.206	822918	839221	1	54
2009-06-24	22.3482	114.202	823239	838896	1	55
2009-06-24	22.291	114.199	816906	838510	1	55
2009-06-24	22.2835	114.126	816065	831043	1	55
2009-06-24	22.2653	114.17	814058	835525	1	55
2009-06-24	22.3149	114.182	819541	836842	1	55
2009-06-24	22.265	114.184	814017	837023	1	55
2009-06-24	22.2701	114.187	814581	837358	1	55
2009-06-24	22.2876	114.219	816524	840561	1	55
2009-06-24	22.3414	114.195	822478	838139	1	55
2009-06-24	22.373	113.989	825992	816938	1	55
2009-06-24	22.3048	114.19	818425	837579	1	55
2009-06-24	22.3048	114.187	818423	837266	1	55
2009-06-24	22.3066	114.251	818631	843913	1	55
2009-06-24	22.3492	114.198	823343	838426	1	55
2009-06-24	22.388	113.972	827659	815198	1	55
2009-06-24	22.3624	114.113	824804	829721	1	55
2009-06-24	22.3392	114.194	822238	838034	1	55
2009-06-24	22.3389	114.192	822209	837814	1	55
2009-06-24	22.3492	114.204	823341	839095	1	55
2009-06-24	22.3468	114.201	823075	838715	1	55
2009-06-24	22.3361	114.203	821891	838982	1	55
2009-06-24	22.4575	114.172	835341	835731	1	55
2009-06-24	22.3371	114.205	822009	839166	1	55
2009-06-24	22.3476	114.203	823162	838986	1	55
2009-06-24	22.3492	114.203	823346	838939	1	55
2009-06-24	22.3352	114.14	821793	832425	1	55
2009-06-24	22.3323	114.221	821465	840856	1	55
2009-06-24	22.3339	114.175	821645	836100	1	55
2009-06-24	22.4053	114.205	829553	839149	1	55
2009-06-24	22.3066	114.193	818624	837960	1	55
2009-06-24	22.3388	114.188	822190	837398	1	55
2009-06-24	22.3359	114.196	821867	838237	1	55
2009-06-24	22.3104	114.178	819045	836346	1	55
2009-06-24	22.2687	114.176	814425	836161	1	55
2009-06-24	22.2849	114.193	816229	837894	1	55
2009-06-24	22.286	114.219	816343	840655	1	55
2009-06-24	22.336	114.138	821885	832232	1	55
2009-06-24	22.2806	114.185	815746	837129	1	55
2009-06-24	22.3331	114.193	821563	837977	1	55
2009-06-24	22.2653	114.127	814053	831111	1	55
2009-06-24	22.2705	114.126	814635	831062	1	55
2009-06-24	22.2775	114.19	815405	837665	1	55
2009-06-24	22.2841	114.147	816141	833159	1	55
2009-06-24	22.2814	114.185	815839	837096	1	55
2009-06-24	22.3511	114.201	823554	838753	1	55
2009-06-24	22.3157	114.18	819634	836583	1	55
2009-06-24	22.3483	114.202	823242	838845	1	55
2009-06-24	22.3344	114.183	821709	836923	1	55
2009-06-24	22.3848	114.193	827290	837962	1	55
2009-06-24	22.3464	114.206	823029	839265	1	55
2009-06-24	22.3384	114.208	822145	839496	1	55
2009-06-24	22.3385	114.193	822157	837973	1	55
2009-06-25	22.2651	114.183	814031	836885	1	56
2009-06-25	22.3216	114.187	820287	837262	1	56
2009-06-25	22.3165	114.176	819718	836193	1	56
2009-06-25	22.3446	114.163	822833	834863	1	56
2009-06-25	22.3458	114.191	822965	837678	1	56
2009-06-25	22.341	114.207	822441	839392	1	56
2009-06-25	22.3356	114.167	821840	835260	1	56
2009-06-25	22.418	114.227	830960	841451	1	56
2009-06-25	22.3136	114.177	819409	836240	1	56
2009-06-25	22.3715	114.189	825811	837485	1	56
2009-06-25	22.3364	114.193	821924	837914	1	56
2009-06-25	22.3504	114.203	823478	838941	1	56
2009-06-25	22.3622	114.137	824787	832182	1	56
2009-06-25	22.3484	114.109	823253	829304	1	56
2009-06-25	22.3486	114.127	823282	831152	1	56
2009-06-25	22.2772	114.164	815371	834977	1	56
2009-06-25	22.3328	114.19	821533	837593	1	56
2009-06-25	22.3327	114.224	821521	841131	1	56
2009-06-25	22.3177	114.234	819860	842141	1	56
2009-06-25	22.3165	114.265	819731	845313	1	56
2009-06-25	22.2579	114.199	813237	838524	1	56
2009-06-25	22.3031	114.163	818242	834835	1	56
2009-06-25	22.3492	114.204	823346	839099	1	56
2009-06-25	22.3364	114.182	821922	836777	1	56
2009-06-25	22.3345	114.218	821720	840468	1	56
2009-06-25	22.3364	114.245	821937	843319	1	56
2009-06-25	22.2816	114.193	815862	837889	1	56
2009-06-25	22.2629	114.133	813784	831788	1	56
2009-06-25	22.292	114.196	817008	838208	1	56
2009-06-25	22.3826	113.978	827055	815779	1	56
2009-06-25	22.3673	114.133	825349	831771	1	56
2009-06-25	22.3526	114.108	823722	829168	1	56
2009-06-25	22.3423	114.201	822576	838775	1	56
2009-06-25	22.2575	114.138	813186	832311	1	56
2009-06-25	22.341	114.185	822440	837145	1	56
2009-06-25	22.3136	114.231	819401	841884	1	56
2009-06-26	22.3445	114.198	822819	838471	1	57
2009-06-26	22.3391	114.193	822231	837891	1	57
2009-06-26	22.3414	114.193	822476	837909	1	57
2009-06-26	22.3448	114.194	822857	838066	1	57
2009-06-26	22.3473	114.205	823132	839128	1	57
2009-06-26	22.3069	114.173	818659	835891	1	57
